# Supplementary material for: Ischemic Stroke Risk Associated with Mitochondrial Haplogroup F in the Asian Population
Source: PubMed Central journal article supplement (PMC7463505; doi:10.3390/cells9081885), 2020-08-11
Supplement: cells-09-01885-s001.pdf [file cells-09-01885-s001.pdf]

## Supplemental tables and figures

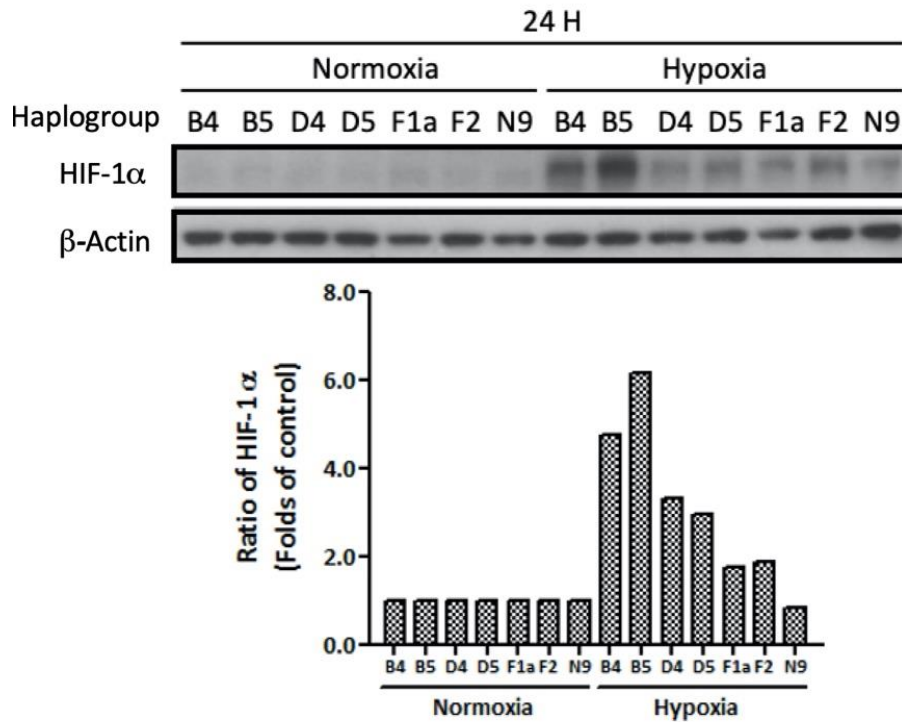

**Supplemental Figure S1:** HIF-1 $\alpha$  expressions in different cybrids under normoxic and hypoxic conditions. Twenty-four hours after hypoxic treatment, discrepant expressions of HIF-1 $\alpha$  was observed in cybrid harboring different mtDNA haplogroup (B4, B5, D4, D5, F1a, F2, N9).  $\beta$ -actin was loading control.

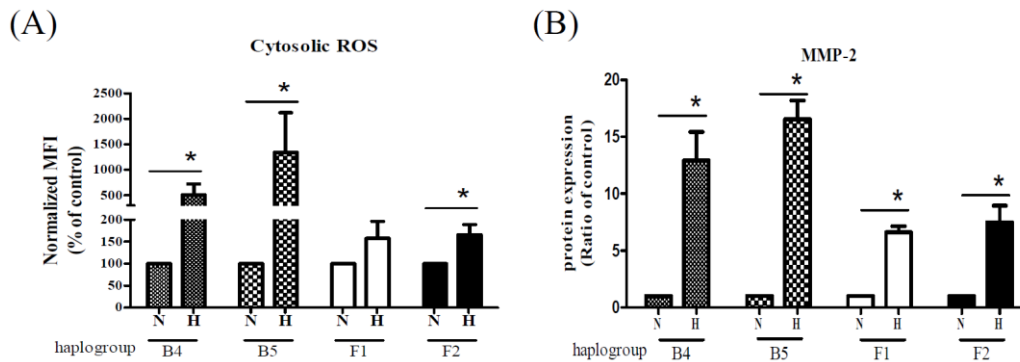

**Supplemental Figure S2:** Comparisons of intracellular ROS generation (A), induction of MMP-2 (B) in different cybrids under hypoxia-ischemia. DCF-based flow cytometry was used for detecting cytosolic ROS. Protein expression of MMP-2 was assessed by western blot. All data are shown as means  $\pm$  S.D. ( $n = 4$ ).  $*p < 0.05$ . N was used to represent normoxic and H to represent hypoxic condition for 24 hours.

**Supplemental Table S1:** 24 pair primers for the mitochondrial DNA to perform the gene amplification by polymerase chain reaction.

|    | primer | sequence (5'→3)'           |       | sequence (3'→5)'            | PCR product |
|----|--------|----------------------------|-------|-----------------------------|-------------|
| 1  | 631    | ACATCACCCATAAACAAATAggTT   | 931   | gCTTCTATTgACTTgggTTAATCg    | 301         |
| 2  | 1272   | AgCAAACCCTgATgAAggCTAC     | 1781  | TATATCTATTgCgCCAaggTTTCAAT  | 510         |
| 3  | 2698   | AgAggCgggCATgACACAgCA      | 3066  | gATCACgTAggACTTTAATCgTTgA   | 369         |
| 5  | 3611   | TCCTATTTATTCTAgCCACCTCTAg  | 3862  | ATCATATTATggCAAaggTCATg     | 252         |
| 6  | 3916   | gAgTCCgAACTAgTCTCAggCT     | 4255  | gAgggggAATgCTggAgATTgTA     | 340         |
| 7  | 4344   | TCgAACCCATCCCTgAgAATCC     | 4577  | gTTATTTCTAggCCTACTCAggTAA   | 234         |
| 8  | 4623   | TCCACAgAAgCTgCCATCAAgTA    | 4940  | gAgAgTgAggAgAAggCTTACgT     | 318         |
| 9  | 4989   | CAgCTACgCAAAATCTTAgCATAAC  | 5257  | TTgggCAAAAAgCCggTTAgCg      | 269         |
| 10 | 5921   | ACTATTCTCTACAAACCACAAAgAC  | 6284  | TgTTCAACCTgTTCTgCTCCg       | 364         |
| 11 | 6535   | CAgACCgCAACCTCAACACCAC     | 6807  | gTgTgTCTACgTCTATTCTACTg     | 273         |
| 12 | 8153   | ggggTATACTACggTCAATgCTC    | 8530  | TCATTTTggTTCTCAgggTTTgTTAT  | 378         |
| 13 | 8628   | CAAATATCTCATCAACAACCgACTA  | 8994  | CAgggCTATTggTTgAATgAgTAg    | 367         |
| 14 | 9044   | TAATTggAAgCgCCACCCTAgC     | 9414  | ggCCTTggTATgTgCTTTCTCgT     | 371         |
| 15 | 9673   | gAAACCAAATAAATTCAAgCACTgCT | 9987  | ACCCTCATCAATAgATggAgACAT    | 315         |
| 16 | 10277  | ACCCCTACCATgAgCCCTACAA     | 10515 | gTgAgATggTAAATgCTAgTATAATAT | 239         |
| 17 | 12274  | AggATAACAgCTATCCATTggTCT   | 12545 | gTggCTCAgTgTCAgTTCgAgAT     | 272         |
| 18 | 12582  | AgACTACTTCTCCATAATATTCATCC | 12858 | gTATAggATTgCTTgAATggCTgC    | 277         |
| 19 | 13077  | CCACTCAAgCACTATAgTTgTAgC   | 13591 | TCAgggAggTAgCgATgAgAgTA     | 515         |
| 20 | 13711  | gCCggAAgCCTATTgCAggAT      | 13980 | CAggTTTTggCTCgTAAgAAggC     | 270         |
| 21 | 14217  | CTAATCAACgCCCATAATCATACAA  | 14562 | gTCgggTgTgTTATTATTCTgAATTT  | 346         |
| 22 | 14829  | TCCgCATgATgAAACTTCggCT     | 15175 | ggCCCCTCAgAATgATATTTggC     | 347         |
| 23 | 15257  | gACAgTCCCACCCTCACAgAT      | 15600 | gggACggATCggAgAATTgTgT      | 344         |
| 24 | 15696  | TTCgCCCACTAAgCCAATCACTT    | 16037 | TCCCATgAAAgAACAgAgAATAgT    | 342         |

**Supplemental Table S2:** The oligonucleotide probes sequences for mtDNA haplogrouping

| Probe for hybridization |         |                           | Probe for hybridization |         |                          |
|-------------------------|---------|---------------------------|-------------------------|---------|--------------------------|
| position                | purpose | sequence (5'→3')          | position                | purpose | sequence (5'→3')         |
| 663                     | a       | GCTAATAGAAAGGCCAGGA       | 8701                    | a       | AGTGTGTGTATGGCTATCATT    |
| 681                     | a       | TGTAATCTTACTGAGAGCTAAT    | 8701                    | b(N)    | AGTGTGTGTATGGTTATCAT     |
| 681                     | b       | TGTAATCTTACTAAGAGCTAA     | 8793                    | a       | CGGACTCCTGCCCCACTCA      |
| 752                     | a       | CGTGCCTTGATGCTTATTCCTTTGA | 8794                    | a       | TGGTGTAAATGAGTAAGGCAGG   |
| 1382                    | a       | GGCTATCGTAGTTGTCTGGG      | 9123                    | a       | GATTTCTAGGATAGTTAGTAGAAT |
| 1438                    | a       | AGCACTTACTCTTAGTTTACT     | 9219                    | p       | ATCACATGCCTATCATATAGTA   |
| 1442                    | a       | AACTAAGCACTCTATTCTCAGT    | 9296                    | a       | CTAATGACCTCCGGTCTAGCC    |
| 1647                    | p       | AGGAGATTTCAACTTAACTTGA    | 9452                    | a       | TTCGATACGGAATAATCCTATT   |
| 3010                    | a       | ATCAGGACATCCCAATGGTG      | 9774                    | p       | ATGCCGTCGGAAATGGTGA      |
| 3010                    | b       | ATCAGGACATCCCGATGGT       | 9950                    | a       | ATTTTGTAGATGTGGTCTGACTA  |
| 3027                    | a       | TGCAGCCGCTATCAAAGG        | 9968                    | a       | GACTATTTCTGTATGTTC       |
| 3644                    | a       | GGATTGAGTAAGCGGCT         | 10310                   | a       | ACTATTAGTGGTAGGTTAGTT    |
| 3667                    | p       | TAGTTTGTAGTTTGTAGTCTCA    | 10310                   | b       | TATTAGTGGCAGGTTAGTTGTT   |
| 3714                    | a       | GAGATTGTTTGGGCCACTGCT     | 10320                   | a       | CCACTAATAATTATGTCATCCC   |
| 3714                    | b       | GAGATTGTTTGGGCTACTGCT     | 10397                   | a       | TACCAATTCAGCCCAGTCTAAT   |
| 3970                    | a       | GGCTATGAAGAATAAGGCGA      | 10400                   | m       | TACCAATTCAGCTCAGTCT      |
| 4048                    | a       | CTAGGAACAACATATAACGCCTC   | 10400                   | m-l     | ACTATATACCAATTCAGCTCAGT  |
| 4048                    | b       | CTAGGAACAACATATGACGCCTC   | 10400                   | n-l     | ACTATATACCAATTCGGTTCAGT  |
| 4071                    | a       | GACAAAATATGTTGTATAGAGTTC  | 10454                   | a       | GACTCATTAAATATGACATCATA  |
| 4071                    | b       | ACAAAATATGTTGTGTAGAGTTC   | 12338                   | a       | AAGTAACAACCATGCACACTA    |
| 4086                    | a       | AAGTAGGGTCTGGTAACAAAATA   | 12372                   | a       | TAACCCTAECTTCCCTAATTC    |
| 4386                    | a       | GGTGTGGTAGGTGGCAC         | 12406                   | a       | ATCCTTACCACCCTCATTAAAC   |
| 4386                    | b       | GGGTGTGATAGGTGGC          | 12501                   | a       | CAACAATATTCATATGCCTAG    |
| 4491                    | a       | CTGGCCCAACCCATCATCTA      | 12501                   | b       | ACAACAATATTCATGTGCCT     |
| 4715                    | a       | TTATGGTTCATTGCCCGGAG      | 12630                   | a       | CGTTACATGATCCATCATAGA    |
| 4820                    | a       | TCTGAGTCCCAGAAGTTACCC     | 12630                   | a       | CGTTACATGATCCATCATAGA    |
| 4833                    | a       | AGGTTACCCAAGCGCCCT        | 12705                   | a       | CTACTCATCTTCTTAATTACC    |
| 4850                    | a       | CTGACATCCGGTCTGCTT        | 12775                   | p       | TAGGAATTATATCCTTCTTGC    |
| 4883                    | a       | AACTAGCCCTATCTCAAT        | 13156                   | p       | CTAAGCATAGTGTAGAGTTTG    |
| 4895                    | a       | CCATCTCAATCATGTACCAA      | 13263                   | a       | TATTATGAGTCTTAGCTGACTTG  |
| 4895                    | b       | ATCTCAATCATATACCAAATC     | 13928                   | a       | GGATTCTACCCTACCATCA      |
| 5108                    | a       | TTATCCTAACTACCACCGCA      | 13928                   | b       | GATTCTACCCTAGCATCA       |
| 5147                    | a       | CTCCAGCACCACAACC          | 13942                   | a       | ATCACACACCCGCAAT         |
| 5178                    | a       | TGAACAAGATAAATGAC         | 14308                   | a       | TAATAGTGTAGGGAGCTGAAT    |
| 5178                    | b       | CTGAAACAAGCTAATATGA       | 14343                   | p       | GTGGGTGAAAGAGTATGATG     |
| 5231                    | a       | TCCCTAGGAGGCTACCCCT       | 14476                   | a       | CTGTAGTATATCCAAAACAACC   |
| 5301                    | a       | TAGCCTCATCGTCCCAACCAT     | 14569                   | a       | ACACACCCGACCACCACTAA     |
| 6146                    | a       | GCTTGGCAACTGGCTAGTTC      | 14893                   | a       | TGCATGGCTAGGAACAGTCTT    |
| 6179                    | a       | GTGCCCCGATATAGCGTTT       | 14893                   | b       | GCATGGCTAGGAATAGTCC      |
| 6680                    | a       | CTCCCATATTTGTAACCTACTACT  | 14979                   | a       | AAGGTAGCGGATGGTTTACG     |
| 6752                    | a       | CAATTGGCTTCTGGGGTT        | 15346                   | a       | CACCTCCTATTCTTACACGAAA   |
| 6752                    | b       | CAATTGGCTTCTAGGGTTT       | 15440                   | a       | ACGCCCTCGGCCTACTTCT      |
| 8272                    | a       | TGGGCTCTAGAGGTGGTGTAT     | 15487                   | a       | TATTCTCACCTGACCTCCT      |
| 8272                    | b       | CTCTAGAGGGGTAGAGGTGGTGT   | 15524                   | a       | TTATACCTTAGCCGACC        |
| 8392                    | a       | GTAATTATGGTGGGTCATACG     | 15535                   | a       | CCAACCCCTTAAATACCCCTC    |
| 8584                    | a       | TACCCGCCACAGTACTGATCA     | 15535                   | b       | AACCCCTTAAACACCCCTCC     |
| 8684                    | a       | ATCATTGTTTTGAGATTAGTTT    | 15924                   | a       | GTTTTCTCTCCGGCTTACAAG    |

**Supplemental Table S3:** Summary of the major non-synonymous mtDNA variants in the coding region of various mitochondrial haplogroups.

| mtDNA SNP (A-A change)  | Locus | Macro-haplogroup N |          |          |          |          |         | Macro-haplogroup M |          |          |         |         |          |          |         |
|-------------------------|-------|--------------------|----------|----------|----------|----------|---------|--------------------|----------|----------|---------|---------|----------|----------|---------|
|                         |       | A                  | B4       | B5       | F1       | F2       | N9a     | C                  | D4       | D5       | E       | G       | M7b      | M7c      | M8a     |
|                         |       | (n = 5)            | (n = 10) | (n = 10) | (n = 10) | (n = 10) | (n = 5) | (n = 5)            | (n = 10) | (n = 10) | (n = 5) | (n = 5) | (n = 10) | (n = 10) | (n = 5) |
| <b>G4048A (Asp-Asn)</b> | ND1   | —                  | —        | —        | —        | —        | —       | —                  | —        | —        | —       | —       | —        | 80% A    | —       |
| A4824G (Thr-Ala)        | ND2   | 100% G             | —        | —        | —        | —        | —       | —                  | —        | —        | —       | —       | —        | —        | —       |
| A4833G (Thr-Ala)        | ND2   | —                  | —        | —        | —        | —        | —       | —                  | —        | —        | 100% G  | —       | —        | —        | —       |
| C5178A (Leu-Met)        | ND2   | —                  | —        | —        | —        | —        | —       | —                  | 100% A   | 100% A   | —       | —       | —        | —        | —       |
| A5301G (Ile-Val)        | ND2   | —                  | —        | —        | —        | —        | —       | —                  | —        | 100% G   | —       | —       | —        | —        | —       |
| T5442C (Phe-Leu)        | ND2   | —                  | —        | —        | —        | —        | —       | —                  | —        | —        | —       | —       | —        | 100% C   | —       |
| G5460A (Ala-Thr)        | ND2   | —                  | —        | —        | —        | —        | —       | —                  | —        | —        | —       | —       | —        | 80% A    | —       |
| G7598A (Ala-Thr)        | COX2  | —                  | —        | —        | —        | —        | —       | —                  | —        | —        | 100% A  | —       | —        | —        | —       |
| G7853A (Val-Ile)        | COX2  | —                  | —        | —        | —        | —        | —       | —                  | —        | —        | —       | —       | 90% A    | —        | —       |
| G8584A (Ala-Thr)        | ATP6  | —                  | —        | 100% A   | —        | —        | —       | 80% A              | —        | —        | —       | —       | —        | —        | 80% A   |
| C8684T (Thr-Ile)        | ATP6  | —                  | —        | —        | —        | —        | —       | —                  | —        | —        | —       | —       | —        | —        | 100% T  |
| A8701G (Thr-Ala)        | ATP6  | —                  | —        | —        | —        | —        | —       | 100% G             | 100% G   | 100% G   | 100% G  | 100% G  | 100% G   | 100% G   | 100% G  |
| C8794T (His-Tyr)        | ATP6  | 100% T             | —        | —        | —        | —        | —       | —                  | —        | —        | —       | —       | —        | —        | —       |
| G9053A (Ser-Asn)        | ATP6  | —                  | —        | —        | 100% G   | —        | —       | —                  | —        | —        | —       | —       | —        | —        | —       |
| A10398G (Thr-Ala)       | ND3   | —                  | —        | 100% G   | —        | —        | —       | 100% G             | 100% G   | 100% G   | 100% G  | 100% G  | 100% G   | 100% G   | 100% G  |
| T10609C (Met-Thr)       | ND4L  | —                  | —        | —        | 100% G   | —        | —       | —                  | —        | —        | —       | —       | —        | —        | —       |
| G11969A (Ala-Thr)       | ND4   | —                  | —        | —        | —        | —        | —       | 100% A             | —        | —        | —       | —       | —        | —        | —       |
| T12338C (Met-Thr)       | ND5   | —                  | —        | —        | —        | 100% C   | —       | —                  | —        | —        | —       | —       | —        | —        | —       |
| A12358G (Thr-Ala)       | ND5   | —                  | —        | —        | —        | —        | 100% G  | —                  | —        | —        | —       | —       | —        | —        | —       |
| G12406A (Val-Ile)       | ND5   | —                  | —        | —        | 100% A   | —        | —       | —                  | —        | —        | —       | —       | —        | —        | —       |
| T12811C (Tyr-His)       | ND5   | —                  | —        | —        | —        | —        | —       | —                  | —        | —        | —       | —       | 80% C    | —        | —       |
| A13263G (Gln-His)       | ND5   | —                  | —        | —        | —        | —        | —       | 100% G             | —        | —        | —       | —       | —        | —        | —       |
| G13708A (Ala-Thr)       | ND5   | —                  | —        | —        | —        | 100% A   | —       | —                  | —        | —        | —       | —       | —        | —        | —       |
| G13759A (Ala-Thr)       | ND5   | —                  | —        | —        | 100% A   | —        | —       | —                  | —        | —        | —       | —       | —        | —        | —       |
| G13928C (Ser-Asn)       | ND5   | —                  | —        | —        | 100% C   | 100% C   | —       | —                  | —        | —        | —       | —       | —        | —        | —       |
| T14318C (Asn-Ser)       | ND5   | —                  | —        | —        | —        | —        | —       | 100% C             | —        | —        | —       | —       | —        | —        | —       |
| T15204C (Ile-Thr)       | CytB  | —                  | —        | —        | —        | —        | —       | 100% C             | —        | —        | —       | —       | —        | —        | —       |

SNP: single nucleotide polymorphism; A-A: amino acid; "—" denotes 100% wild-type; Ala: Alanine; Asn: asparagine; Asp: aspartic acid; Gln: glutamine; His: histidine; Ile: isoleucine; Leu: leucine; Met: methionine; Phe: phenylalanine; Ser: serine; Thr: threonine; Tyr: tyrosine; Val: valine; ND1~5: NADH dehydrogenase subunit 1~5; ATP6: ATP synthase 6; COX2: cytochrome c oxidase subunit II; CytB: cytochrome b.
